# Supplementary material for: Nitrogen-doped graphene-supported cobalt carbonitride@oxide core–shell nanoparticles as a non-noble metal electrocatalyst for an oxygen reduction reaction
Source: Royal Society of Chemistry journal article supplement (doi:10.1039/c4ta03850a), 2014-11-19
Supplement: c4ta03850a1.pdf [file c4ta03850a1.pdf]

## Electronic Supplementary Information (ESI)

### Nitrogen-doped Graphene-Supported Cobalt Carbonitride@Oxide Core-Shell Nanoparticles as a Non-noble Metal Electrocatalyst for Oxygen Reduction Reaction

Yingsi Wu, Qianqian Shi, Yuhang Li, Zhuangchai Lai, Hao Yu\*, Hongjuan Wang,  
Feng Peng\*

School of Chemistry and Chemical Engineering, South China University of  
Technology, Guangzhou, 510640, China. Email: yuhao@scut.edu.cn (H.Y.);  
cefpeng@scut.edu.cn (F.P.); Tel. & Fax.: +86-20-8711 4916.

#### 1. Calculations for K-L plots and Tafel plots

To investigate the kinetics of the catalysts in ORR, LSV curves performed at various rotating speeds and the Koutecky-Levich (K-L) plots ( $J^{-1}$  vs.  $\omega^{-1/2}$ ) were obtained. RDE measurements on the CoCN@CoO<sub>x</sub>(18)/NG and h-Co<sub>3</sub>O<sub>4</sub>/NG catalysts show the current densities increased with the rotating speeds increased from 400 to 2800 rpm (Fig. 4b, c). According to the K-L theory, the inverse of current density ( $J^{-1}$ ) is plotted against the inverse of the square root of the rotating speed ( $\omega^{-1/2}$ ) at different potential values (inserts of Fig. 4b, c). The transferred electron number ( $n$ ) per oxygen molecule involved in the ORR process can be calculated from the slope of the K-L plots using the following equation:

$$J^{-1} = J_L^{-1} + J_K^{-1} = (0.62nFCD^{2/3}\nu^{-1/6}\omega^{1/2})^{-1} + J_K^{-1},$$

where  $J$  is the measured current density,  $J_L$  is the diffusion limiting current density,  $J_K$  is the kinetic current density.  $n$  is the overall number of electrons transferred in ORR,  $F$  is the Faraday constant ( $F = 96485 \text{ C mol}^{-1}$ ),  $C$  is the concentration of O<sub>2</sub>,  $D$  is the diffusion coefficient of O<sub>2</sub>,  $\nu$  is the kinematic viscosity of the electrolyte, and  $\omega$  is the electrode rotating speed in rpm. Since in our study the electrolyte was the O<sub>2</sub>-saturated 0.1 M KOH solution, the values  $C$ ,  $D$  and  $\nu$  were used as  $1.2 \times 10^{-3} \text{ M}$ ,  $1.9 \times 10^{-5} \text{ cm}^2 \text{ s}^{-1}$  and  $0.01 \text{ cm}^2 \text{ s}^{-1}$ , respectively.

For Tafel plots, the kinetic current density was calculated from the relation in K-L equation:

$$J_K = \frac{J \times J_L}{(J_L - J)}$$

From K-L equation, the diffusion limiting current density  $J_L$  of  $\text{CoCN@CoO}_x(18)/\text{NG}$  is calculated as  $5.33 \text{ mA cm}^{-2}$ , which is close to that of Pt-C ( $5.70 \text{ mA cm}^{-2}$ ) and higher than that of  $\text{h-Co}_3\text{O}_4/\text{NG}$  ( $4.82 \text{ mA cm}^{-2}$ ).

## 2. Supplementary results

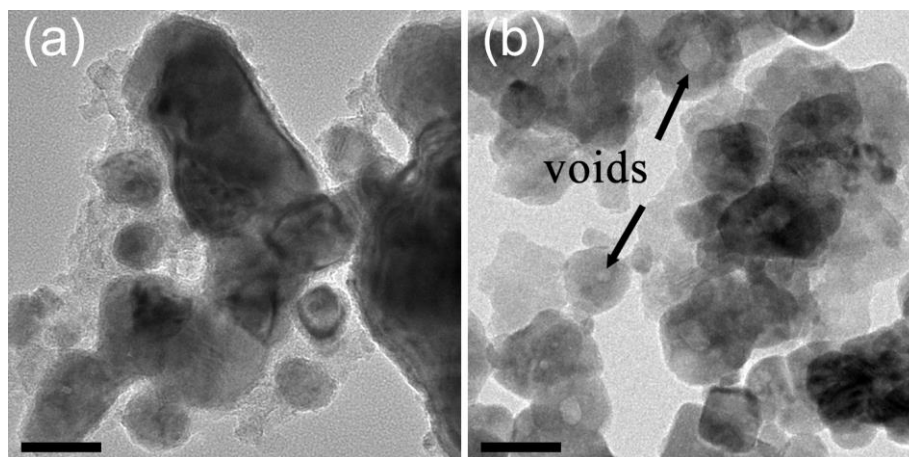

Fig. S1 TEM images of bulk (a) CoN and (b)  $\text{Co}_3\text{O}_4$  samples. Scale bars: 50 nm.

The oxidation of bulk CoN without NG resulted in solid  $\text{Co}_3\text{O}_4$  particles, although some hollow structures can be observed, as shown in Fig. S1, due to the longer diffusion distance in the larger particles.<sup>1</sup>

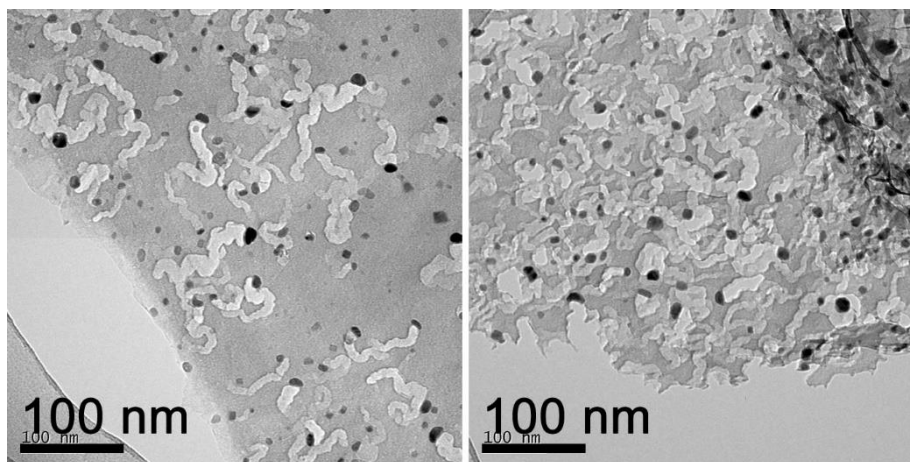

Fig. S2 TEM images of  $\text{CoCN@CoO}_x/\text{NG}$ .

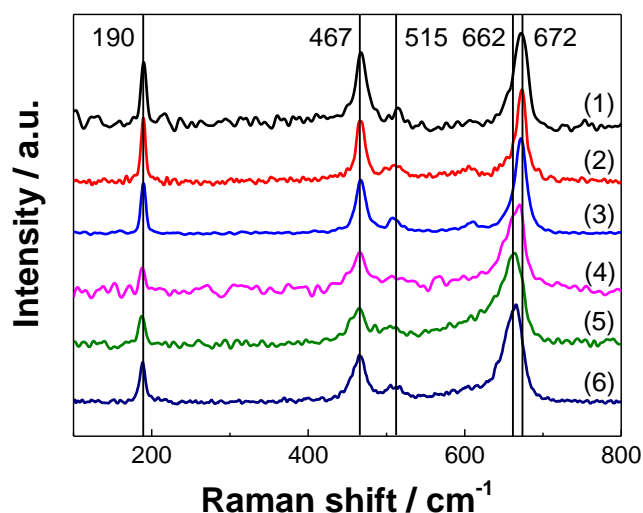

Fig. S3 Raman spectra of (1) CoCN@CoO<sub>x</sub>(18)/NG, (2) CoCN@CoO<sub>x</sub>(63)/NG, (3) CoN, (4) h-Co<sub>3</sub>O<sub>4</sub>/NG, (5) CoO and (6) Co<sub>3</sub>O<sub>4</sub>.

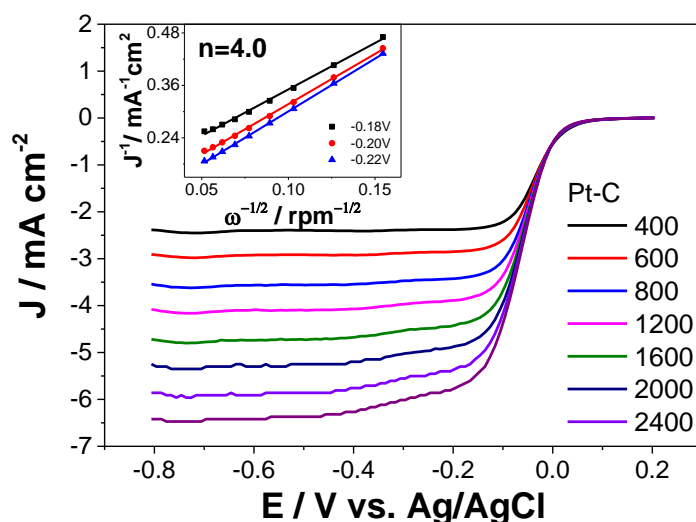

Fig. S4 LSV curves of Pt-C at various rotating speeds with a scan rate of 10 mV/s in O<sub>2</sub>-saturated 0.1 M KOH solution; the inset is the calculated K-L plots at different potentials (-0.18, -0.20, -0.22 V vs. Ag/AgCl).

### Synthesis and characterizations of CoCN@CoO<sub>x</sub>/NG with different particles sizes

Three deposition methods have been applied to control the size of CoCN@CoO<sub>x</sub> particles on graphene: homogeneous oxidative precipitation (HP), NH<sub>3</sub> H<sub>2</sub>O-catalyzed hydrolysis (N) and the direct impregnation of acetate cobalt (I). Fig. S5 show the TEM images and size distributions of the CoCN NPs prepared from these three methods. The particle size of CoCN@CoO<sub>x</sub>(5)/NG is relatively larger than the other two samples. The more detailed statistic on the NPs shows their shell thickness and core diameters, as listed in Table S4 and represented by the TEM images in Fig. S6.

As shown in Table S4, the shell thickness remains unchanged across the three

samples, therefore the volume ratio ( $V_{\text{core}}/V_{\text{shell}}$ ) grows with the particle size. It was also noted that, since the smaller particles are more prone to be oxidized to form hollow structures, the percentage of hollow NPs decreased from 25.7% to 6.5% with the particle size increasing.

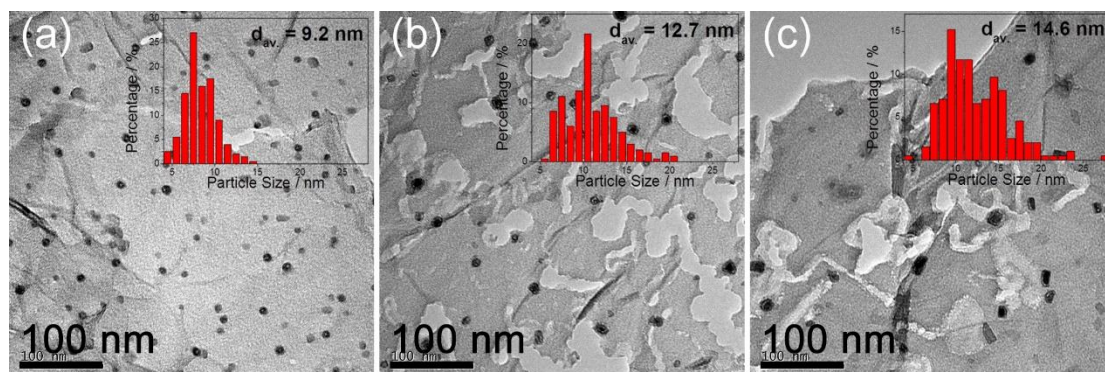

Fig. S5 TEM images of (a) CoCN@CoO<sub>x</sub>/NG-HP, (b) CoCN@CoO<sub>x</sub>/NG-I and (c) CoCN@CoO<sub>x</sub>(5)/NG.

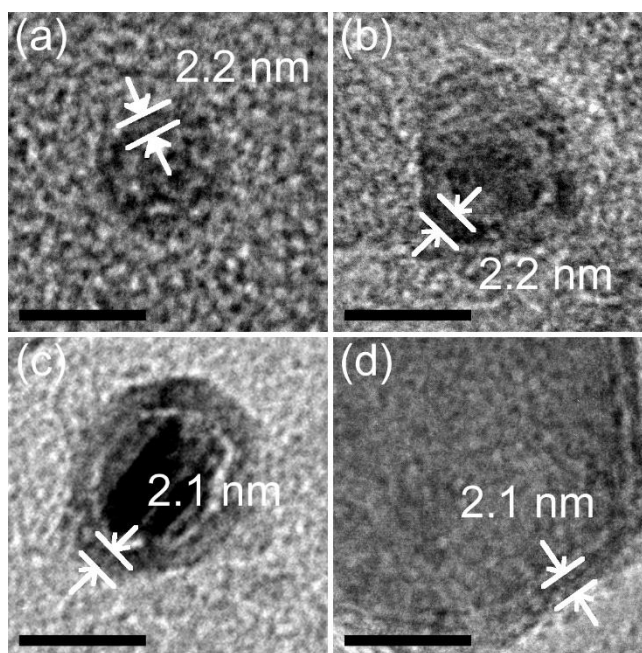

Fig. S6 HRTEM images of (a) CoCN@CoO<sub>x</sub>/NG-HP, (b) CoCN@CoO<sub>x</sub>/NG-I, (c) CoCN@CoO<sub>x</sub>(5)/NG and (d) CoCN@CoO<sub>x</sub>(18)/NG. Scale bars: 10 nm.

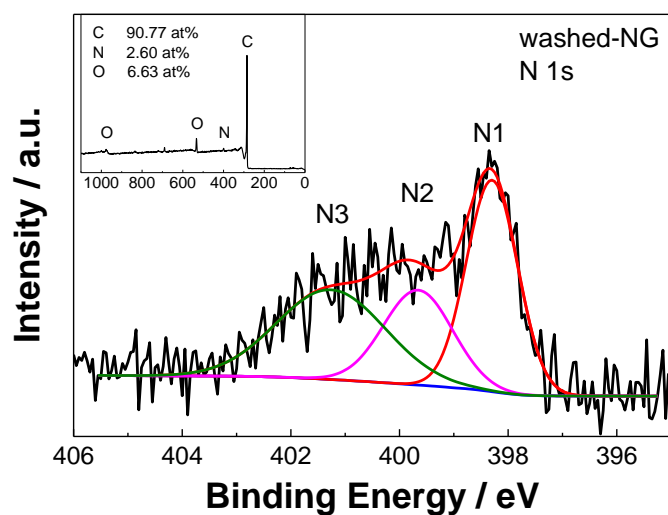

Fig. S7 XPS survey and high resolution N 1s spectrum of washed NG. The O content of 6.63at% in the survey spectrum may be from the oxygen-containing groups on GO, which cannot be completely removed by  $\text{NH}_3$  annealing at 700 °C, depositing CoCN particles and subsequent HCl washing.

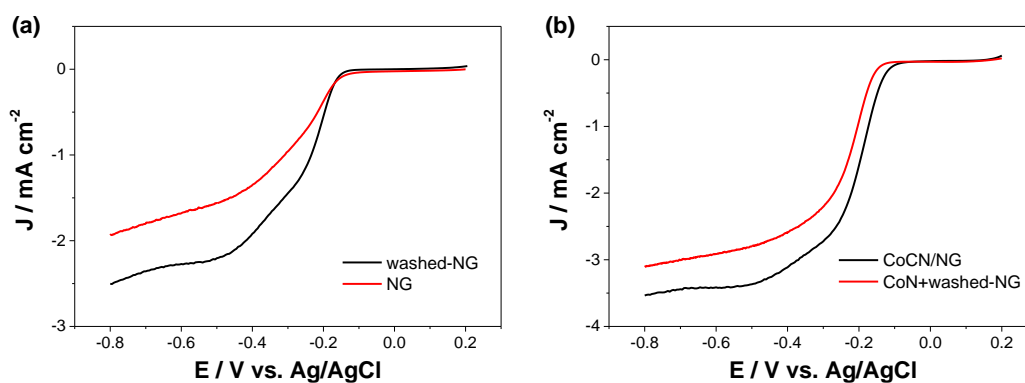

Fig. S8 LSV curves of (a) washed-NG and NG, (b) CoCN/NG and CoN+washed-NG in  $\text{O}_2$ -saturated 0.1 M KOH solution at 1600 rpm rotating speed with a scan rate of 10 mV/s.

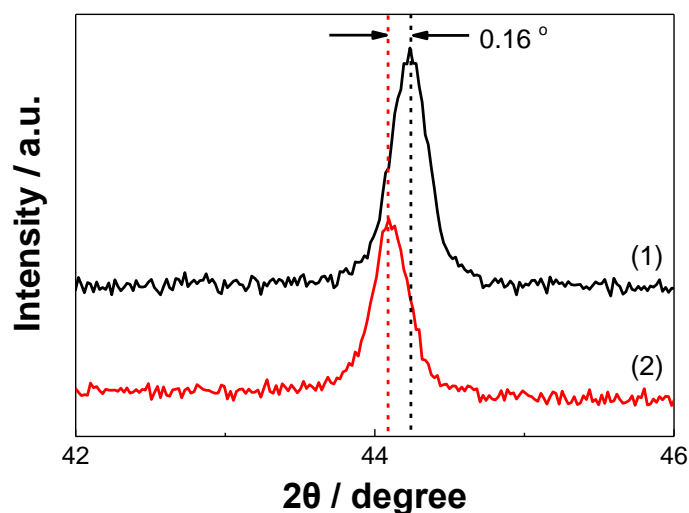

Fig. S9 XRD patterns of (1) CoCN/NG and (2) CoN+washed-NG.

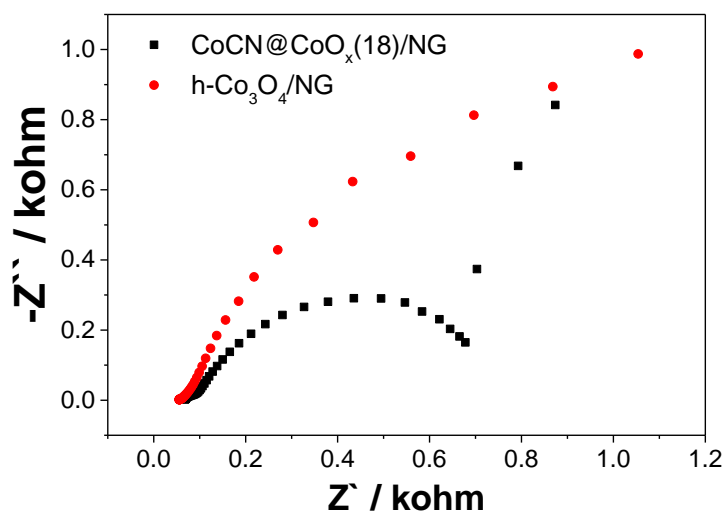

Fig. S10 EIS of CoCN@CoO<sub>x</sub>(18)/NG and h-Co<sub>3</sub>O<sub>4</sub>/NG in 0.1 M KOH solution at a constant potential of -0.1 V.

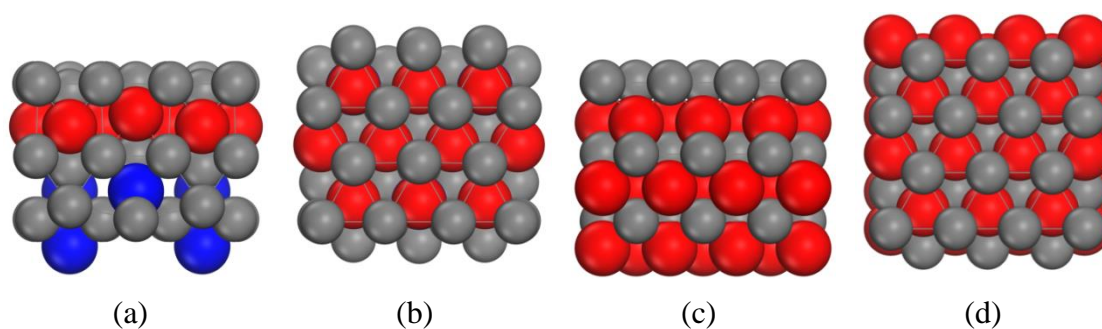

Fig. S11 CPK models of optimized structures. (a) and (b) are lateral view and vertical view of Co<sub>4</sub>N@CoO, respectively. (c) and (d) are lateral view and vertical view of CoO, respectively. Gray: cobalt, red: oxygen, blue: nitrogen. The bond length of Co-Co on the surface in (b) is 2.430 Å, while it is 2.553 Å in (d), indicating that the interaction between cobalt atoms on the surface is stronger and the stability of the structure is enhanced when CoO wraps the Co<sub>4</sub>N.

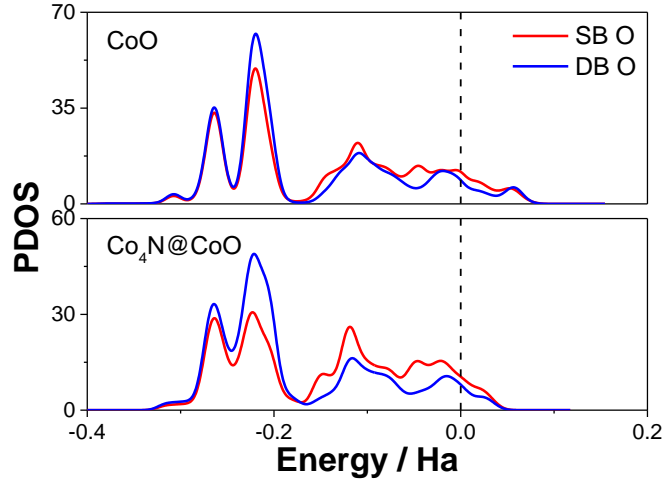

Fig. S12 PDOS of single-bonded oxygen (SB O, O 4 in Fig. 5) and double-bonded oxygen (DB O, O 5 in Fig. 5).

Table S1 Nomenclature, mass fraction of cobalt, nitrogen and oxygen and specific surface area of the catalysts.

| Catalysts                            | Co<br>(wt%) | N<br>(at%) | O<br>(at%) | $S_{\text{BET}}$<br>( $\text{m}^2/\text{g}$ ) | Pore volume<br>( $\text{cm}^3/\text{g}$ ) |
|--------------------------------------|-------------|------------|------------|-----------------------------------------------|-------------------------------------------|
| CoCN@CoO <sub>x</sub> (5)/NG         | 4.8         | 2.4        | 5.9        | 337                                           | --                                        |
| CoCN@CoO <sub>x</sub> (18)/NG        | 18.0        | 2.4        | 5.1        | 109                                           | 0.27                                      |
| CoCN@CoO <sub>x</sub> (63)/NG        | 63.0        | --         | --         | --                                            | --                                        |
| h-Co <sub>3</sub> O <sub>4</sub> /NG | 21.3        | 2.3        | 7.3        | 126                                           | 0.65                                      |
| NG                                   | --          | 2.7        | 10.2       | 381                                           | 1.51                                      |
| washed-NG                            | --          | 2.6        | 6.6        | 82                                            | --                                        |

Table S2 Contents of three nitrogen species in various catalysts by XPS.

|                                      | N1-pyridinic N<br>(at%) | N2-pyrrolic N<br>(at%) | N3-graphitic N<br>(at%) |
|--------------------------------------|-------------------------|------------------------|-------------------------|
| CoCN@CoO <sub>x</sub> (18)/NG        | 1.40                    | 0.58                   | 0.45                    |
| h-Co <sub>3</sub> O <sub>4</sub> /NG | 1.41                    | 0.48                   | 0.39                    |
| NG                                   | 1.40                    | 0.86                   | 0.43                    |
| washed-NG                            | 1.04                    | 0.62                   | 0.94                    |

Table S3 Summary of ORR activities in 0.1 M KOH for catalysts in this work and representative catalysts in references.

| Source    | Materials                     | Half-wave<br>potential (V<br>vs. Ag/AgCl) | $\Delta(E_{\text{Pt}}-E_{\text{mater.}})$ at<br>half-wave <sup>a</sup> (V<br>vs. Ag/AgCl) | $J_{(-0.5\text{V})}$ ( $\text{mA}$<br>$\text{cm}^{-2}$ ) |
|-----------|-------------------------------|-------------------------------------------|-------------------------------------------------------------------------------------------|----------------------------------------------------------|
| This work | CoCN@CoO <sub>x</sub> (18)/NG | -0.16                                     | 0.05                                                                                      | 5.62                                                     |

|    |                                                                      |        |        |       |
|----|----------------------------------------------------------------------|--------|--------|-------|
|    | h-Co <sub>3</sub> O <sub>4</sub> /NG                                 | -0.21  | 0.10   | 4.52  |
| 2  | Co <sub>3</sub> O <sub>4</sub> /N-rmGO                               | ~-0.21 | ~-0.05 | ~4.80 |
| 3  | G-Co/CoO                                                             | ~-0.18 | ~-0.07 | ~4.30 |
| 4  | Co <sub>1-x</sub> S/RGO                                              | ~-0.29 | --     | ~4.90 |
| 5  | CoS <sub>2</sub>                                                     | ~-0.35 | --     | ~3.30 |
| 6  | NiCo <sub>2</sub> O <sub>4</sub> -rGO                                | ~-0.36 | ~-0.23 | ~1.38 |
| 7  | Co <sub>0.5</sub> Mn <sub>0.5</sub> O <sub>y</sub> N <sub>z</sub> /C | ~-0.29 | ~-0.10 | ~4.00 |
| 8  | C-COP-P-Co                                                           | ~-0.24 | ~-0.02 | ~5.90 |
| 9  | Fe <sub>x</sub> N/NGA                                                | ~-0.13 | ~0     | ~5.50 |
| 10 | N-CG-CoO                                                             | ~-0.24 | --     | ~1.75 |
| 11 | Mn <sub>3</sub> O <sub>4</sub> /NG                                   | ~-0.23 | ~-0.08 | ~3.49 |
| 12 | La <sub>0.8</sub> Sr <sub>0.2</sub> MnO <sub>3</sub>                 | ~-0.36 | ~-0.16 | ~4.00 |
| 13 | ZIF-derived N-C                                                      | ~-0.34 | ~-0.12 | ~3.60 |
| 14 | NT-G                                                                 | ~-0.16 | ~-0.01 | ~5.50 |

<sup>a</sup> Difference between half-wave potentials of the catalyst and Pt/C.

Table S4 Physical and geometrical properties of CoCN@CoO<sub>x</sub>/NG catalysts.

|                               | Co<br>(w%) | S <sub>BET</sub><br>(m <sup>2</sup> /g) | D <sub>NPs</sub><br>(nm) | D <sub>Core</sub><br>(nm) | W <sub>Shell</sub><br>(nm) | V <sub>core</sub> /V <sub>shell</sub> | Hollow<br>(%) |
|-------------------------------|------------|-----------------------------------------|--------------------------|---------------------------|----------------------------|---------------------------------------|---------------|
| CoCN@CoO <sub>x</sub> /NG-HP  | 5.0        | 245                                     | 9.2                      | 3.5                       | 2.2                        | 0.11                                  | 25.7          |
| CoCN@CoO <sub>x</sub> /NG-I   | 7.9        | 276                                     | 12.7                     | 6.7                       | 2.3                        | 0.34                                  | 12.0          |
| CoCN@CoO <sub>x</sub> (5)/NG  | 4.8        | 337                                     | 14.6                     | 9.1                       | 2.3                        | 0.70                                  | 10.1          |
| CoCN@CoO <sub>x</sub> (18)/NG | 18.0       | 109                                     | 17.9                     | 13.4                      | 2.3                        | 1.77                                  | 6.5           |

Table S5 Population analyses of Mulliken charge and bond length (atomic numbers refer to Fig. 5)

| Substrate             | Mulliken Charge (e) |       |       |        |        | Bond Length (Å) |       |       |       |
|-----------------------|---------------------|-------|-------|--------|--------|-----------------|-------|-------|-------|
|                       | 1                   | 2     | 3     | 4      | 5      | 1-4             | 2-5   | 3-5   | 4-5   |
| Before adsorption     |                     |       |       |        |        |                 |       |       |       |
| CoO                   | 0.088               | 0.088 | 0.088 | -      | -      | -               | -     | -     | -     |
| Co <sub>4</sub> N@CoO | 0.118               | 0.108 | 0.118 | -      | -      | -               | -     | -     | -     |
| After adsorption      |                     |       |       |        |        |                 |       |       |       |
| CoO                   | 0.218               | 0.275 | 0.269 | -0.259 | -0.356 | 1.775           | 1.999 | 1.988 | 1.490 |
| Co <sub>4</sub> N@CoO | 0.335               | 0.316 | 0.358 | -0.273 | -0.350 | 1.804           | 1.917 | 1.970 | 1.512 |

## References

1. H. J. Fan, U. Gösele and M. Zacharias, *Small*, 2007, **3**, 1660-1671.
2. Y. Y. Liang, Y. G. Li, H. L. Wang, J. G. Zhou, J. Wang, T. Regier and H. J. Dai, *Nat. Mater.*, 2011, **10**, 780-786.
3. S. J. Guo, S. Zhang, L. Wu and S. H. Sun, *Angew. Chem. Int. Ed.*, 2012, **124**, 11940-11943.



4. H. Wang, Y. Liang, Y. Li and H. Dai, *Angew. Chem. Int. Ed.*, 2011, **50**, 10969-10972.
5. C. Zhao, D. Q. Li and Y. J. Feng, *J. Mater. Chem. A*, 2013, **1**, 5741-5746.
6. G. Q. Zhang, B. Y. Xia, X. Wang and X. W. Lou, *Adv. Mater.*, 2013, **26**, 2408-2412.
7. B. F. Cao, G. M. Veith, R. E. Diaz, J. Liu, E. A. Stach, R. R. Adzic and P. G. Khalifah, *Angew. Chem. Int. Ed.*, 2013, **125**, 10953-10957.
8. Z. H. Xiang, Y. H. Xue, D. P. Cao, L. Huang, J. F. Chen and L. M. Dai, *Angew. Chem. Int. Ed.*, 2014, **53**, 2433-2437.
9. H. B. Yin, C. Z. Zhang, F. Liu and Y. L. Hou, *Adv. Funct. Mater.*, 2014, **24**, 2930-2937.
10. S. Mao, Z. H. Wen, T. Z. Huang, Y. Hou and J. H. Chen, *Energy Environ. Sci.*, 2014, **7**, 609-616.
11. J. J. Duan, Y. Zheng, S. Chen, Y. H. Tang, M. Jaroniec and S. Z. Qiao, *Chem. Commun.*, 2013, **49**, 7705-7707.
12. C. Jin, X. C. Cao, L. Y. Zhang, C. Zhang and R. Z. Yang, *J. Power Sources*, 2013, **241**, 225-230.
13. P. Zhang, F. Sun, Z. H. Xiang, Z. G. Shen, J. Yun and D. P. Cao, *Energy Environ. Sci.*, 2014, **7**, 442-450.
14. Y. G. Li, W. Zhou, H. L. Wang, L. M. Xie, Y. Y. Liang, F. Wei, J.-C. Idrobo, S. J. Pennycook and H. J. Dai, *Nat. Nanotechnol.*, 2012, **7**, 394-400.
